# Supplementary material
Source: publisher site journal article supplement (https://www.dovepress.com/article/383810)

**Figure 1S:** Example of a simple algorithm to differentiate between an orange and an apricot

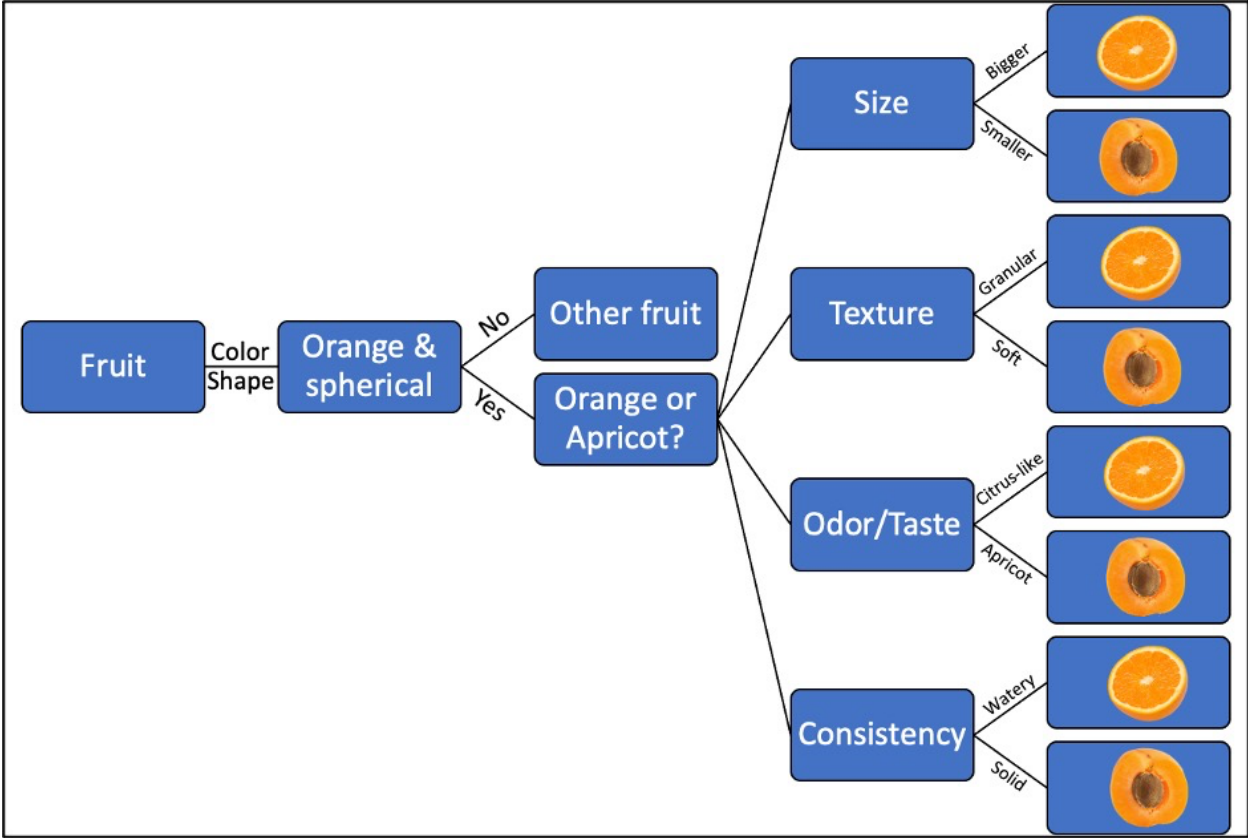

Figure 2S: Suggested algorithm that can help detecting consolidation on chest x-ray

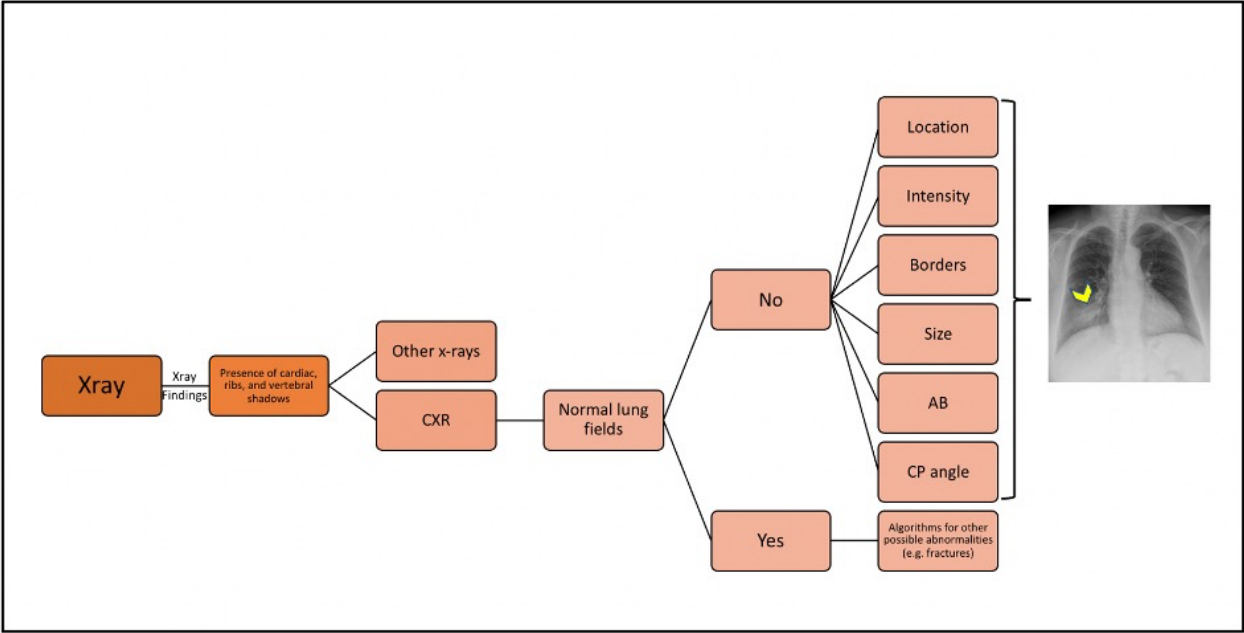

CXR: Chest x-ray; AB: Air bronchogram; CP: Costophrenic

➤ Opacity

**Figure 3S:** Simple representation of the use of artificial intelligence in various medical specialties

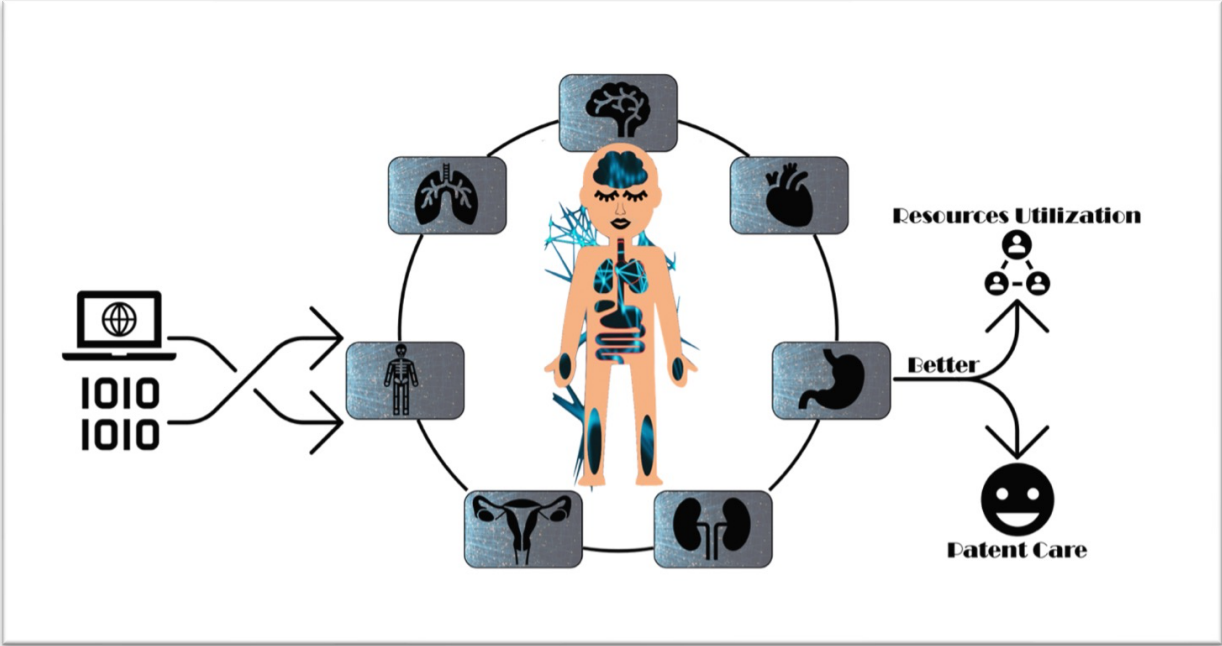

Supplement: Supplementary file 1 [file get_supplementary_file.php]
